# Supplementary material for: Immunological characterization of Plasmodium vivax Pv32, a novel predicted GPI-anchored merozoite surface protein
Source: Springer Nature journal article supplement (doi:10.1186/s12936-018-2401-7), 2018-07-27
Supplement: MOESM1 [file 15983332]

**Table S1.** Origin of *pv32* gene sequences from worldwide isolates

| Country          | Sequence ID                                                                                                                                                                |
|------------------|----------------------------------------------------------------------------------------------------------------------------------------------------------------------------|
| Brazil           | Brazil22<br>Brazil 32<br>Brazil                                                                                                                                            |
| Bolivia          | Bolivia                                                                                                                                                                    |
| Colombia         | Colombia_30102100437<br>Colombia_30102100448<br>Colombia_30102100490<br>Colombia1<br>Columbia_30101099036<br>Columbia_30102100485                                          |
| India            | IndiaNYC<br>IndiaVII                                                                                                                                                       |
| Madagascar       | M08                                                                                                                                                                        |
| Mexico           | Mexico21A<br>Mexico566A<br>Mexico760A<br>Mexico32-E-03<br>Mexico55-03<br>Mexico118-A<br>Mexico165-A<br>Mexico1<br>Mexico6308                                               |
| North korea      | Northkorean                                                                                                                                                                |
| Peru             | Peru262<br>Peru852<br>Peru692<br>Peru3136<br>Peru2025<br>Peru07<br>Peru260<br>Peru3133<br>PeruDTS0830                                                                      |
| Papua New Guinea | PNG58<br>PNG72                                                                                                                                                             |
| Thailand         | Thailand<br>Thailand_VKBT-72<br>Thailand_VKBT-94<br>Thailand_VKBT-95<br>Thailand_VKBT-100<br>Thailand_VKBT-106<br>Thailand_VKBT-36<br>Thailand_VKBT-39<br>Thailand_VKBT-45 |
| China            | China_NB_-15<br>China_NB-16<br>China_NB-17<br>China_LZCH-20                                                                                                                |
