# Supplementary material for: Immunological characterization of Plasmodium vivax Pv32, a novel predicted GPI-anchored merozoite surface protein
Source: Springer Nature journal article supplement (doi:10.1186/s12936-018-2401-7), 2018-07-27
Supplement: MOESM3 [file 15983332]

**Table S2.** List of *Pv32* haplotypes identified from 11 countries

| Haplotype no. | Haplotype sequence |
|---------------|--------------------|
| Hap_1         | CCCGACGCGGG        |
| Hap_2         | CCCGACACGGG        |
| Hap_3         | CCCGACGCAAA        |
| Hap_4         | CCCCACGCGGG        |
| Hap_5         | CCCCATGCGGG        |
| Hap_6         | CCCCATGCGGA        |
| Hap_7         | CCGGACGCGGG        |
| Hap_8         | CCCGACGCGGA        |
| Hap_9         | CCCCACGCAGA        |
| Hap_10        | CCCCACGCGGA        |
| Hap_11        | CCCGATGCAAA        |
| Hap_12        | CCCCATGCAAA        |
| Hap_13        | CTCGACGCGGG        |
| Hap_14        | CCCCACGCAAA        |
| Hap_15        | GCCGACGAGGG        |
| Hap_16        | GCCCCCGCAAA        |
